# Supplementary material
Source: PubMed Central journal article supplement (PMC4624332)

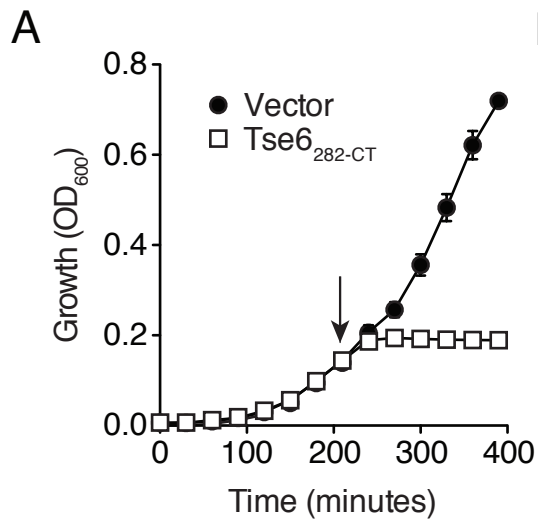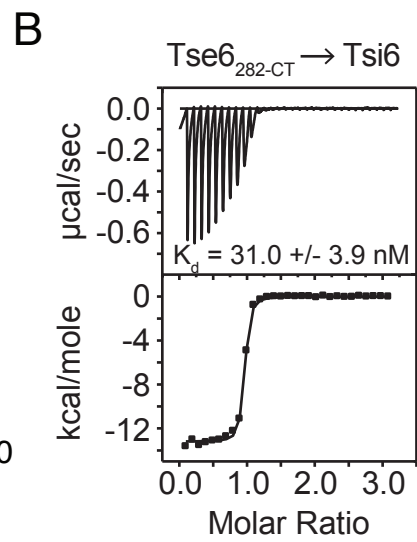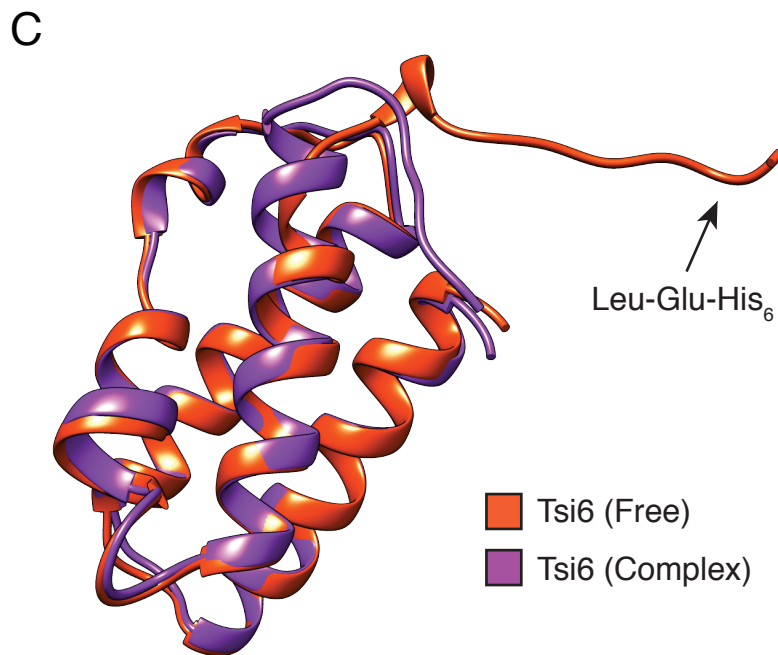

Supplement: NIHMS723579-supplement-1.pdf [file NIHMS723579-supplement-1.pdf]

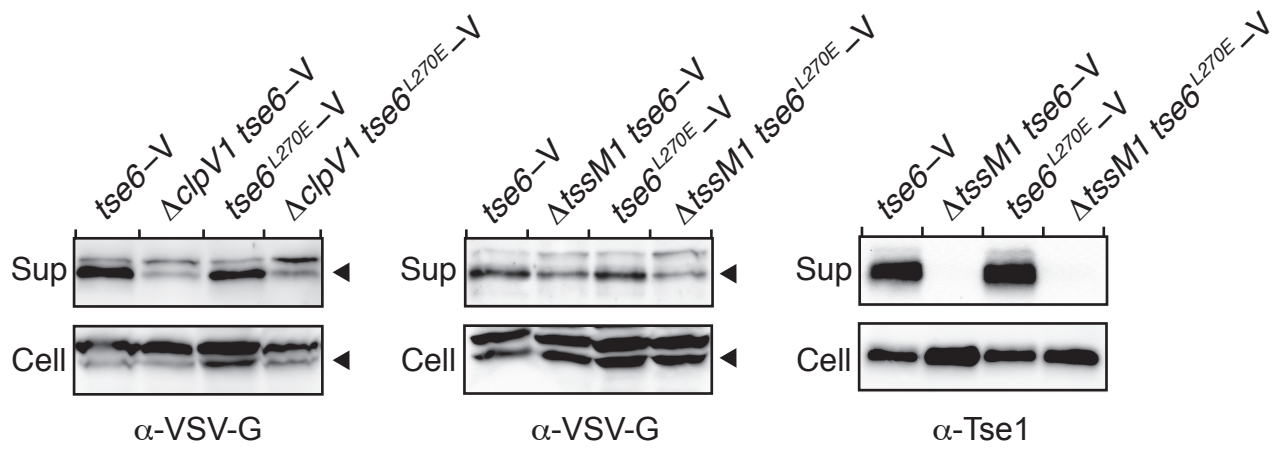

Supplement: NIHMS723579-supplement-5.pdf [file NIHMS723579-supplement-5.pdf]

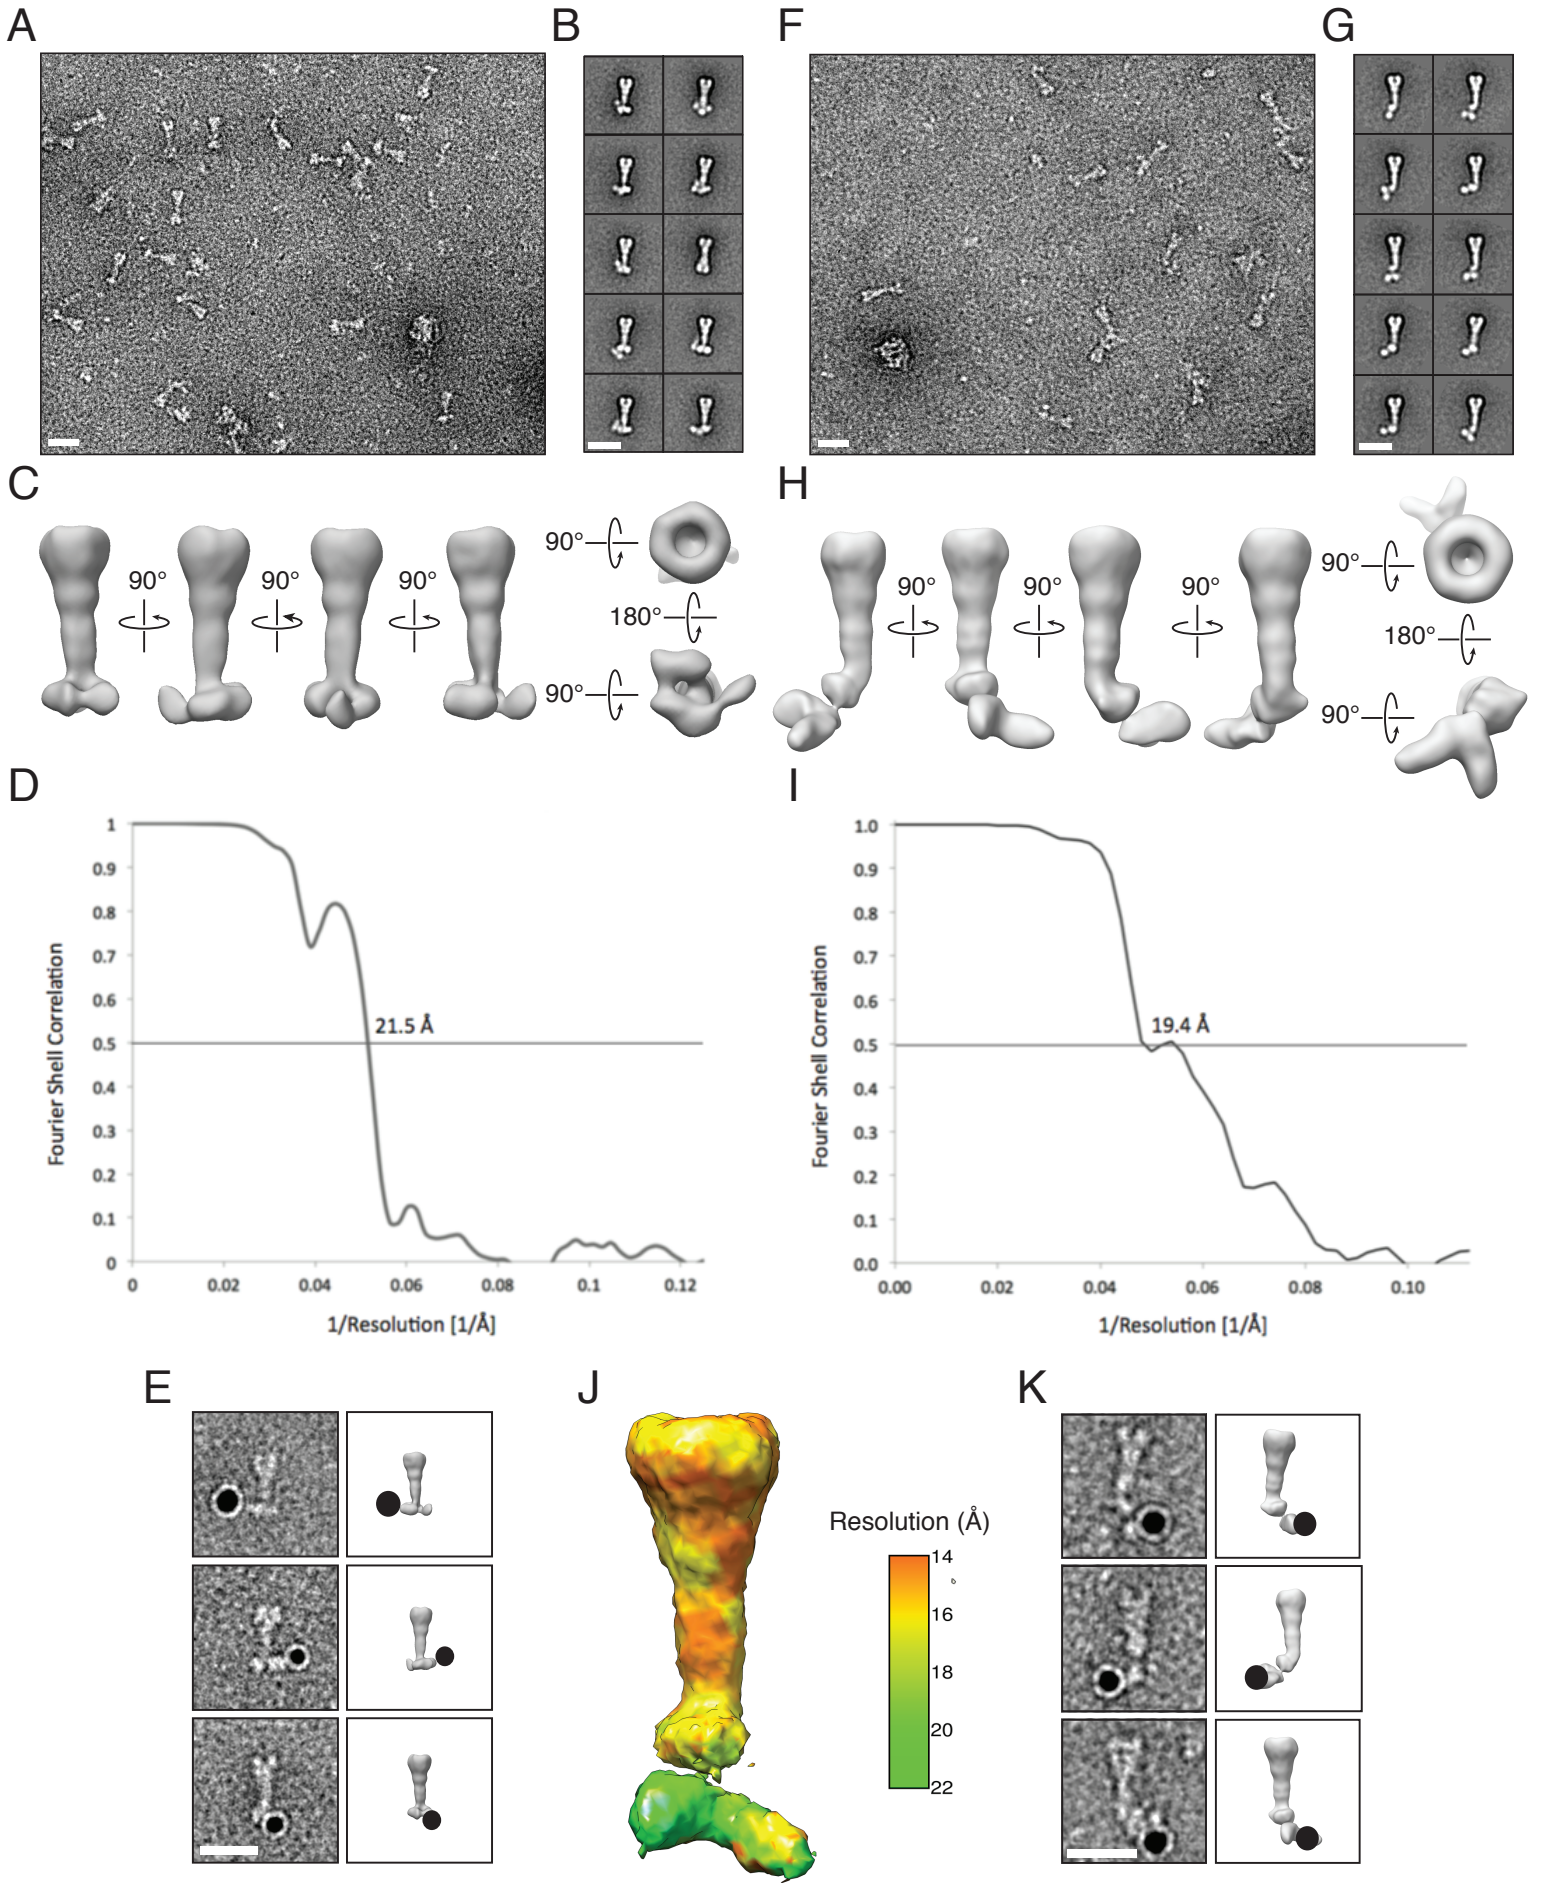

Supplement: NIHMS723579-supplement-6.pdf [file NIHMS723579-supplement-6.pdf]

A

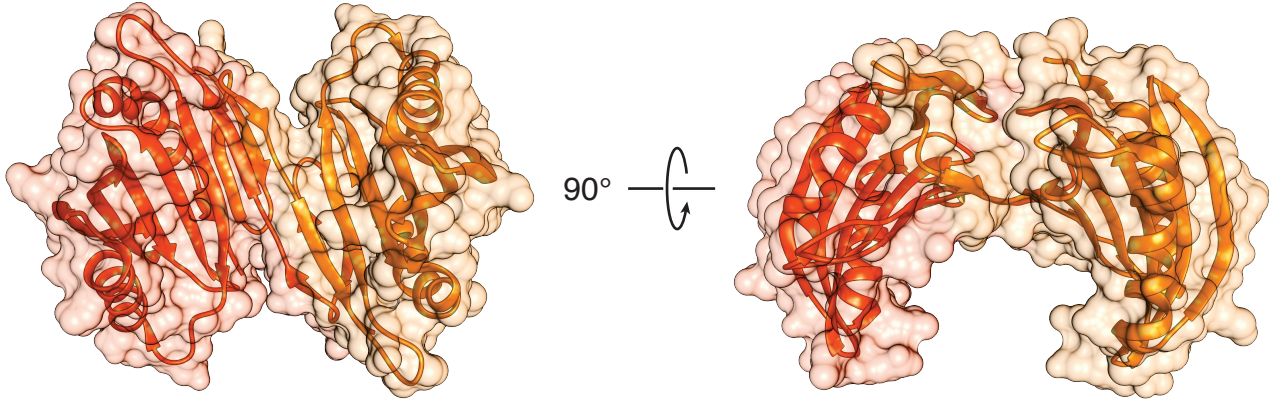

B

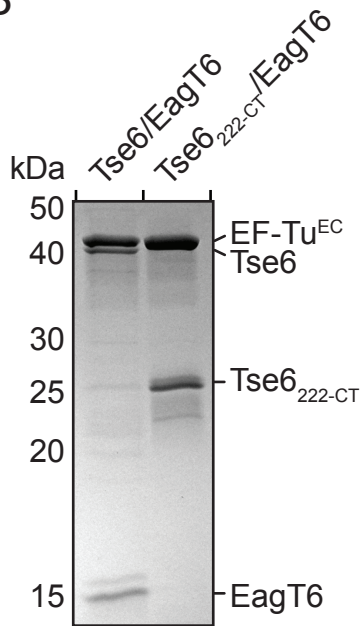

C

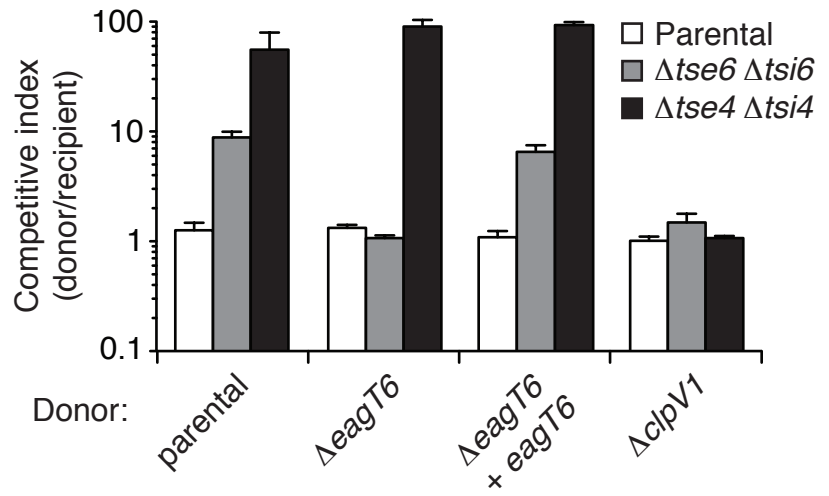

Supplement: NIHMS723579-supplement-7.pdf [file NIHMS723579-supplement-7.pdf]
